# Supplementary material
Source: PubMed Central journal article supplement (PMC8982579)
Supplement: EMBR-23-e52984-s006.pdf [file EMBR-23-e52984-s006.pdf]

1 **APPENDIX**

2

3 **TERT activates endogenous retroviruses to promote an**  
4 **immunosuppressive tumour microenvironment**

5

6 Jian Mao<sup>#</sup>, Qian Zhang<sup>#</sup>, Yaxiang Wang, Yang Zhuang, Lu Xu, Xiaohe Ma, Di Guan,  
7 Junzhi Zhou, Jiang Liu, Xiaoying Wu, Qian Liang, Miao Wang, Yu-Sheng Cong<sup>\*</sup>

8

9 Key Laboratory of Aging and Cancer Biology of Zhejiang Province, Hangzhou Normal  
10 University School of Basic Medical Sciences, Hangzhou, China.

11 <sup>#</sup>These authors contributed equally to this work.

12 <sup>\*</sup>For correspondence: yscong@hznu.edu.cn

13

14 **Table of Contents**

15

16 **Appendix Table S1. siRNA oligonucleotides used for RNA interference.....2**

17 **Appendix Table S2. Primers used for quantitative real-time PCR analysis.....3**

18 **Appendix Table S3. Primers used for qPCR analysis of telomere length (T/S**  
19 **ratio).....5**

20 **Appendix Table S4. Primers used for strand-specific reverse transcription.....6**

21 **Appendix Table S5. Datasets for RNA-seq analysis from GEO.....7**

22

23

24

25

26

27

28 **Appendix Table S1. siRNA oligonucleotides used for RNA interference.**

| Name     | Sequences (5' - 3')   |
|----------|-----------------------|
| siTERT-1 | GGUAUGCCGUGGUCCAGAATT |
| siTERT-2 | GCGACGACGUGCUGGUUCATT |
| siSp1-1  | CCAGCAACAUGGGAAUUAUTT |
| siSp1-2  | GUGCAAACCAACAGAUUAUTT |

29

30

31

32

33

34

35

36

37

38

39

40

41

42

43

44

45

46

47

48

49

50

51

**Appendix Table S2. Primers used for quantitative real-time PCR analysis.**

| Name                       | Forward (5' - 3')              | Reverse (5' - 3')            |
|----------------------------|--------------------------------|------------------------------|
| <b>human</b>               |                                |                              |
| DDX58                      | AGTCTGACTGTCCTTTCTACT<br>TGAAA | ATCCCGTTGATCTCCAGGG<br>AA    |
| IFIH1                      | GGGGCATGGAGAATAACTCA           | TGCCCATGTTGCTGTTATGT         |
| IFNB1                      | ACGCCGCATTGACCATCTAT           | GTCTCATTCCAGCCAGTGC<br>T     |
| CXCL10                     | TGTACCTGCATCAGCATTAG           | CATCTCTTCTCACCTTCTT<br>T     |
| IFI44                      | TGGTACATGTGGCTTTGCTC           | CCACCGAGATGTCAGAAA<br>GAG    |
| OASL                       | CCCATCACGGTCACCATTG            | GCAGAAATTTCCAGGACCA<br>C     |
| ISG15                      | GCGAACTCATCTTTGCCAGT<br>A      | CCAGCATCTTCACCGTCAG          |
| ISG20                      | GGCTACACAATCTACGACAC           | TCGGATTCTCTGGGAGATT<br>T     |
| MLT10-int*                 | CAAACCCAAGCCTCATGAAA           | TCAGGGCTATCTGAAAGTG<br>G     |
| LTR69*                     | GAATTACTGGGTCTCCATGA<br>C      | AGGGAGTTTAAGCTATTCT<br>TGT   |
| LTR38-int*                 | CTAGCTGACCCTGTAGTAAG<br>A      | CTTTGTATCAGTGAAGCTT<br>TGG   |
| MER88*                     | GTCCTCACTCTCTCTCAGTT           | CTGGGAGAGGAATAGGAG<br>ATTA   |
| MER92C*                    | GAAGTTTGTCCCTCTGAAAC<br>TA     | TAAGAGAGAGCATCCCAG<br>AG     |
| MLT1G1-<br>int*            | GACCTTAGGGTCAAGATCAA<br>AC     | GCTACAAACCAAGGGATA<br>CA     |
| GAPDH                      | CGGAGTCAACGGATTTGGTC<br>GTAT   | TGCTAAGCAGTTGGTGGTG<br>CAGGA |
| $\beta$ -actin             | AGAGCTACGAGCTGCCTGAC           | AGCACTGTGTTGGCGTACA<br>G     |
| VEGF<br>promoter           | GAGCTTCCCCTTCATTGCGG           | CGGCTGCCCCAAGCCTC            |
| $\beta$ -actin<br>promoter | GGGTCTGCGCTGTAAGAGTT           | GAACTCAGCCAAGGGGAC<br>TC     |

| <b>mouse</b>    |                              |                                   |
|-----------------|------------------------------|-----------------------------------|
| MuERVL          | ATCTCCTGGCACCTGGTATG         | AGAAGAAGGCATTTGCCA<br>GA          |
| IAP-Pol         | CTTGCCCTTAAAGGTCTAAA<br>AGCA | GCGGTATAAGGTACAATTA<br>AAAGATATGG |
| IAP-Gag         | AATCTCAGAACCGCTCCATG<br>A    | TTTCTTAAAATGCCCAGGC<br>TTT        |
| MuLV            | GGCGCCCCGTACAAGATTTC<br>ATA  | GATAACGGGCCTGCCTTCA<br>CCTC       |
| MusD            | GATTGGTGGAAGTTTAGCTA<br>GCAT | TAGCATTCTCATAAGCCAAT<br>TGCAT     |
| MMERGL<br>N_LTR | CCCTCTGACCTAAGTTAAAT<br>GT   | CAACAGGAGACAGTGGAT<br>TC          |
| MMERGL<br>N-int | CAGCAGTAGTGGATGGAAAG         | GTACCGGCTGTCAGTATAG<br>A          |
| Gapdh           | TCAACAGCAACTCCCCTCT<br>TCCA  | ACCACCCTGTTGCTGTAGC<br>CGTAT      |

53 \* Also used in MeDIP-qPCR and ChIP-qPCR.

54

55

56

57

58

59

60

61

62

63

64

65

66

67

68

69

70

71 **Appendix Table S3. Primers used for qPCR analysis of telomere length (T/S**  
72 **ratio).**

| Name  | Forward (5' - 3')                                | Reverse (5' - 3')                               |
|-------|--------------------------------------------------|-------------------------------------------------|
| hTel  | CGGTTTGGTTTGGGTTTGGG<br>TTTGGGTTTGGGTTTGGGT<br>T | GGCTTGCCTTACCCTTAC<br>CCTTACCCTTACCCTTACC<br>CT |
| h36B4 | CAGCAAGTGGGAAGGTGT<br>AATCC                      | CCCATCTATCATCAACGG<br>GTACAA                    |

73  
74  
75  
76  
77  
78  
79  
80  
81  
82  
83  
84  
85  
86  
87  
88  
89  
90  
91  
92  
93  
94  
95

96

**Appendix Table S4. Primers used for strand-specific reverse transcription.**

| <b>Name</b>              | <b>Primer (5' - 3')</b> |
|--------------------------|-------------------------|
| MLT1O-int-sense          | GTCTCGGGTTCTGACTGCTG    |
| MLT1O-int-antisense      | ACTAAGATTTAAGGAAGTTG    |
| LTR69-sense              | TGTCGTGTTTCGGGGGTCTCG   |
| LTR69-antisense          | TGTAGTATACTATAAGAGAC    |
| LTR38-int-sense          | AGAGGCAGAGGGAGGCTGGG    |
| LTR38-int-antisense      | GGCCATGGAGCCACCTGTG     |
| MER88-sense              | TGTGTTGTAAATGGGGGAGT    |
| MER88-antisense          | TGTATTGTAAATTTTTAAAA    |
| MER92C-sense             | TGTCAAAGACAAAAACCGAA    |
| MER92C-antisense         | TGACTCCCGTAAGACTCGCG    |
| MLT1G1-int-sense         | CATAAAATATTTTTTATGAA    |
| MLT1G1-int-antisense     | TATTCATTTTTTAAGCAAGA    |
| $\beta$ -actin-sense     | CTAGAAGCATTTGCGGTGGA    |
| $\beta$ -actin-antisense | ATGGATGATGATATCGCCGC    |

97

98

99

100

101

102

103

104

105

106

107

108

109 **Appendix Table S5. Datasets for RNA-seq analysis from GEO.**

| <b>Deposited Data</b> | <b>Identifier</b>                                                                                                                                        |
|-----------------------|----------------------------------------------------------------------------------------------------------------------------------------------------------|
| <b>Human tumours</b>  |                                                                                                                                                          |
| BRCA                  | GSE52194                                                                                                                                                 |
| cHL                   | GSE120328                                                                                                                                                |
| COADREAD              | GSE144259<br>GSE121842                                                                                                                                   |
| HGSC                  | GSE131880                                                                                                                                                |
| KIRC                  | GSE119674                                                                                                                                                |
| LIHC                  | GSE136846<br>GSE81550                                                                                                                                    |
| LUAD                  | GSE80126                                                                                                                                                 |
| OSCC                  | GSE125866                                                                                                                                                |
| PAAD                  | GSE119794                                                                                                                                                |
| PRAD                  | GSE111320                                                                                                                                                |
| THCA                  | GSE64912                                                                                                                                                 |
| <b>Human tissues</b>  |                                                                                                                                                          |
| appendix              | appendix_4b: ERR315345, ERR315366<br>appendix_4c: ERR315454, ERR315481                                                                                   |
| bone marrow           | bonemarrow_5a: ERR315425, ERR315469<br>bonemarrow_6a: ERR315396, ERR315486<br>bonemarrow_6b: ERR315404, ERR315406<br>bonemarrow_6c: ERR315333, ERR315395 |
| brain                 | brain_a: ERR315432<br>brain_3b: ERR315477<br>brain_3c: ERR315455                                                                                         |
| fat                   | fat_a: ERR315332<br>fat_e: ERR315342, ERR315343;<br>fat_x1: ERR315378, ERR315431                                                                         |
| gall bladder          | gallbladder_5a: ERR315349, ERR315470, ERR315474<br>gallbladder_5b: ERR315347, ERR315480<br>gallbladder_5c: ERR315360, ERR315427                          |
| heart                 | heart_5b: ERR315384, ERR315413<br>heart_6a: ERR315356, ERR315430<br>heart_6b: ERR315331, ERR315367                                                       |

|                 |                                                                                                                                                                                                                             |
|-----------------|-----------------------------------------------------------------------------------------------------------------------------------------------------------------------------------------------------------------------------|
| kidney          | kidney_a: ERR315494<br>kidney_b: ERR315443<br>kidney_c: ERR315468<br>kidney_d: ERR315383                                                                                                                                    |
| liver           | liver_a: ERR315451, ERR315463<br>liver_c: ERR315327, ERR315394<br>liver_d: ERR315414                                                                                                                                        |
| lung            | lung_3e: ERR315346<br>lung_3f: ERR315341<br>lung_4a: ERR315326, ERR315424<br>lung_4b: ERR315439, ERR315444                                                                                                                  |
| lymph node      | lymphnode_4a: ERR315371, ERR315373<br>lymphnode_4b: ERR315393, ERR315488<br>lymphnode_5a: ERR315440, ERR315441, ERR315493<br>lymphnode_5b: ERR315387, ERR315426, ERR315475<br>lymphnode_5c: ERR315329, ERR315390, ERR315471 |
| ovary           | ovary_6a: ERR315380, ERR315482<br>ovary_6b: ERR315402, ERR315458                                                                                                                                                            |
| pancreas        | pancreas_6a: ERR315466, ERR315479<br>pancreas_6b: ERR315429, ERR315436                                                                                                                                                      |
| prostate        | prostate_a: ERR315410<br>prostate_4a: ERR315330, ERR315359<br>prostate_4b: ERR315340, ERR315407<br>prostate_4c: ERR315354, ERR315365                                                                                        |
| small intestine | smallintestine_4a: ERR315344, ERR315419<br>smallintestine_4b: ERR315364, ERR315408<br>smallintestine_4c: ERR315381, ERR315388<br>smallintestine_4d: ERR315409, ERR315423                                                    |
| spleen          | spleen_3a: ERR315338<br>spleen_3b: ERR315405, ERR315416<br>spleen_3c: ERR315473<br>spleen_3d: ERR315448                                                                                                                     |
| stomach         | stomach_a: ERR315467<br>stomach_3a: ERR315379<br>stomach_3b: ERR315369, ERR315485                                                                                                                                           |
| testis          | testis_4a: ERR315350, ERR315351<br>testis_7a: ERR315352<br>testis_7b: ERR315456<br>testis_7c: ERR315391<br>testis_7d: ERR315446<br>testis_7e: ERR315415<br>testis_7f: ERR315492                                             |
| thymus          | Thymus RNA: SRR1957206<br>404 RNA-Seq: GSM2935638                                                                                                                                                                           |



|                      |                                                                                                                                                         |
|----------------------|---------------------------------------------------------------------------------------------------------------------------------------------------------|
|                      | 405 RNA-Seq: GSM2935639<br>Human whole thymus extract_1: GSM1399180<br>Human whole thymus extract_2: GSM1399181                                         |
| thyroid              | thyroid_5a: ERR315358, ERR315422<br>thyroid_5b: ERR315337, ERR315412<br>thyroid_5c: ERR315363, ERR315428<br>thyroid_5d: ERR315397, ERR315483, ERR315491 |
| <b>Mouse tissues</b> |                                                                                                                                                         |
| several tissues      | GSE74747                                                                                                                                                |
| heart                | GSE90178                                                                                                                                                |
| kidney               | GSE90179                                                                                                                                                |
| lung                 | GSE90181                                                                                                                                                |
| small intestine      | GSE90191                                                                                                                                                |
| spleen               | GSE90182                                                                                                                                                |
| stomach              | GSE90192                                                                                                                                                |
| testis               | GSE90184                                                                                                                                                |
| thymus               | GSE90183                                                                                                                                                |

110

111
