# Supplementary material
Source: PubMed Central journal article supplement (PMC8982579)

**Fig 1**

**E**

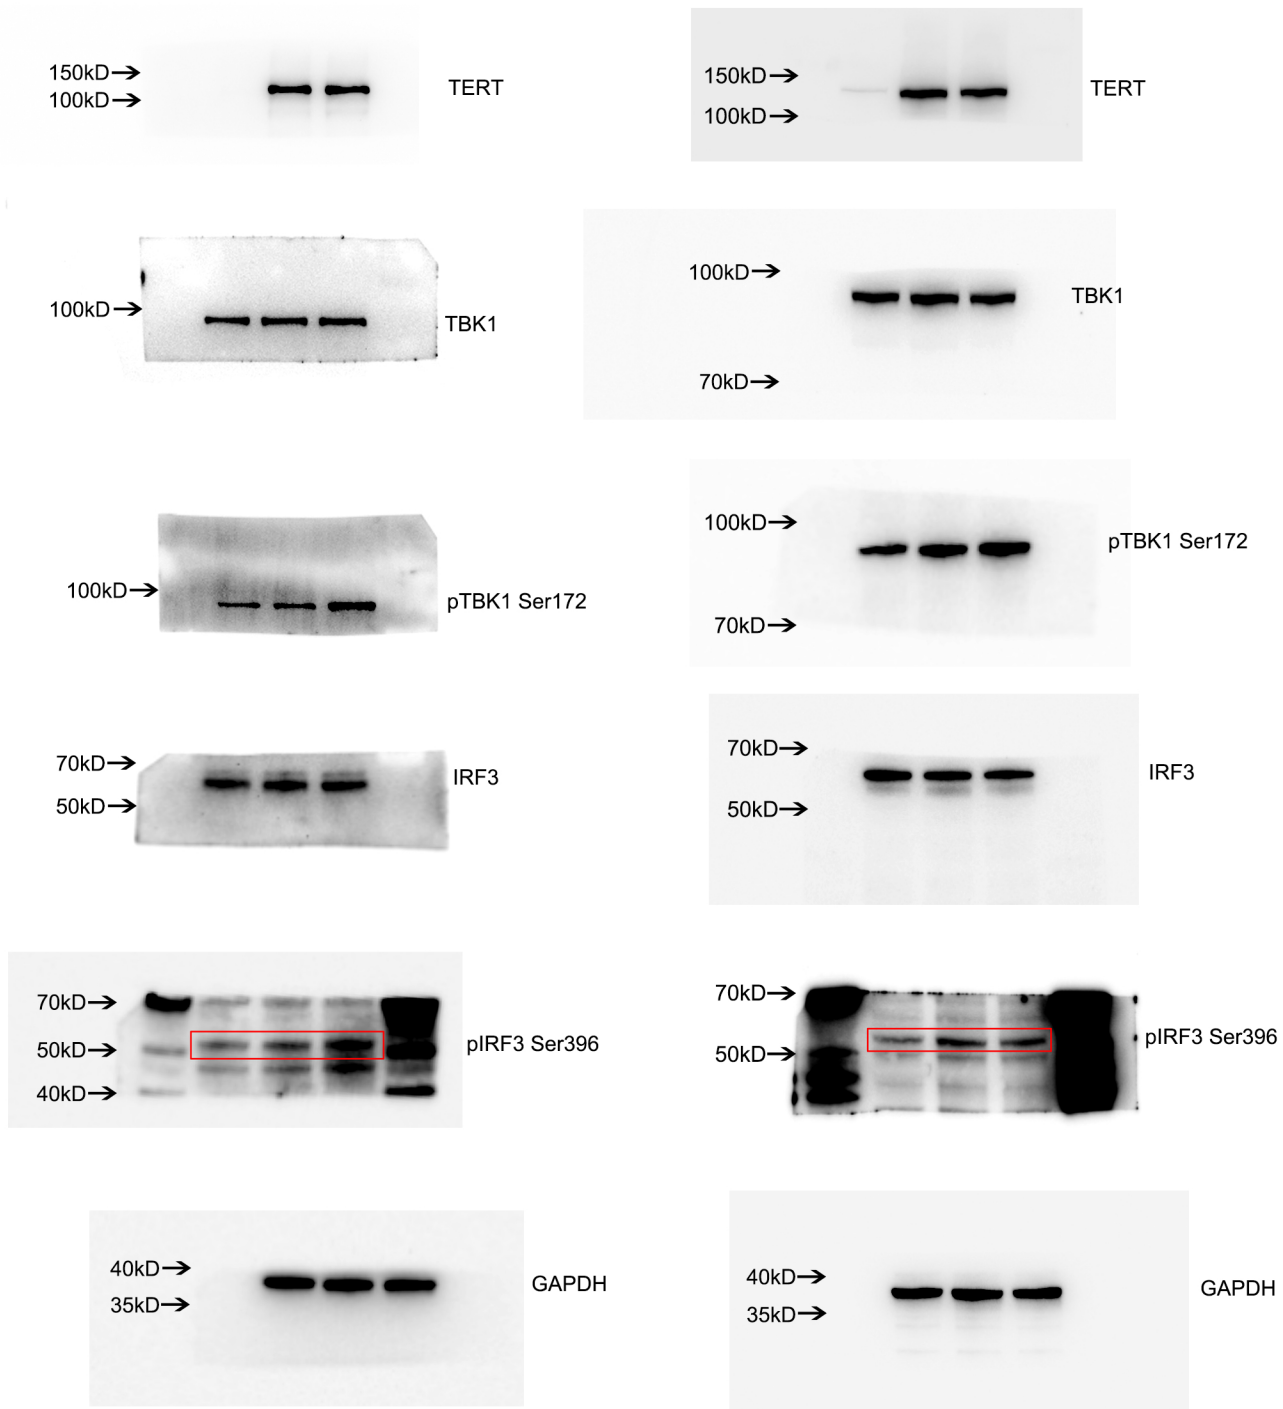

**H**

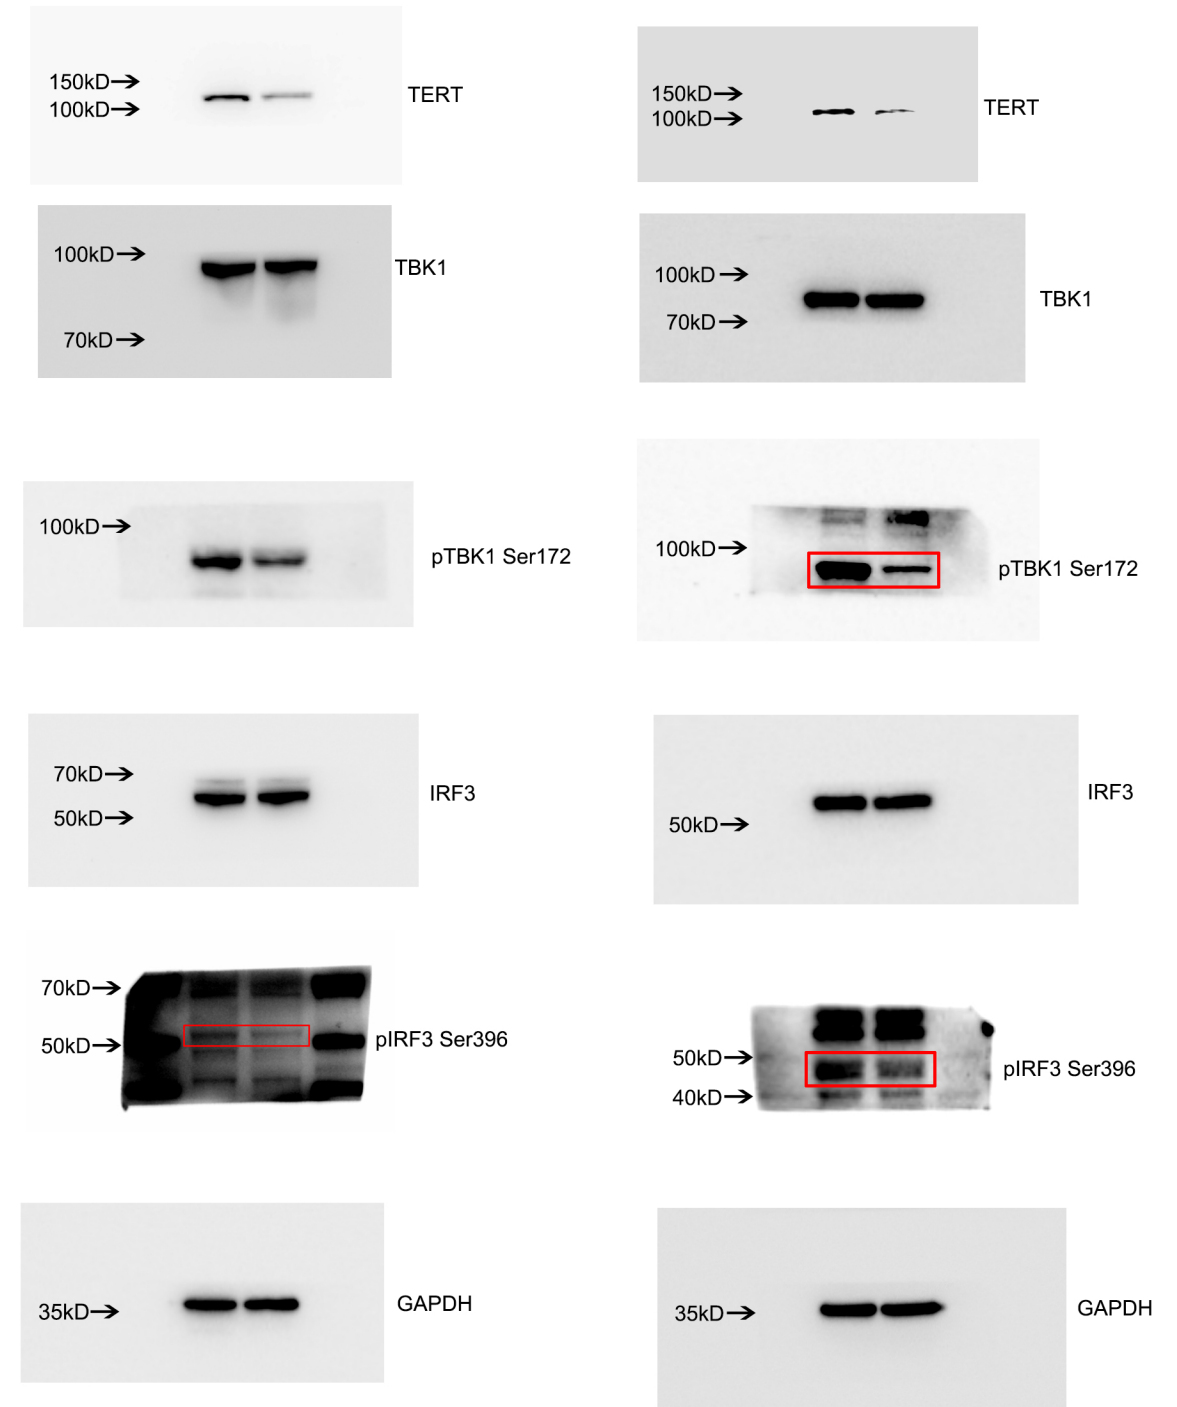

Supplement: EMBR-23-e52984-s002.pdf [file EMBR-23-e52984-s002.pdf]

**Fig 2G**

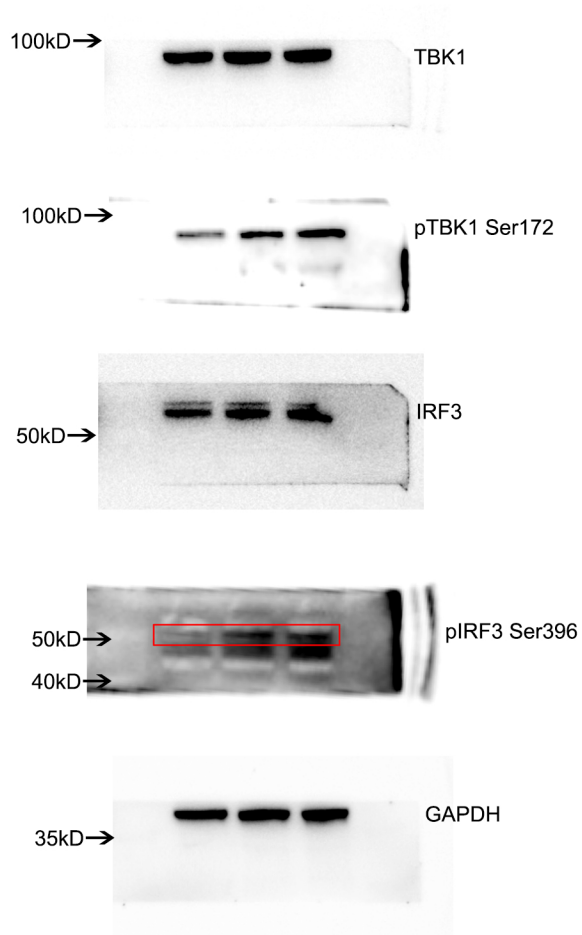

Supplement: EMBR-23-e52984-s005.pdf [file EMBR-23-e52984-s005.pdf]
